# Supplementary material
Source: publisher site journal article supplement (https://www.dovepress.com/article/232313)
Supplement: Supplementary file 1 [file get_supplementary_file.php]

Supplementary figure 1

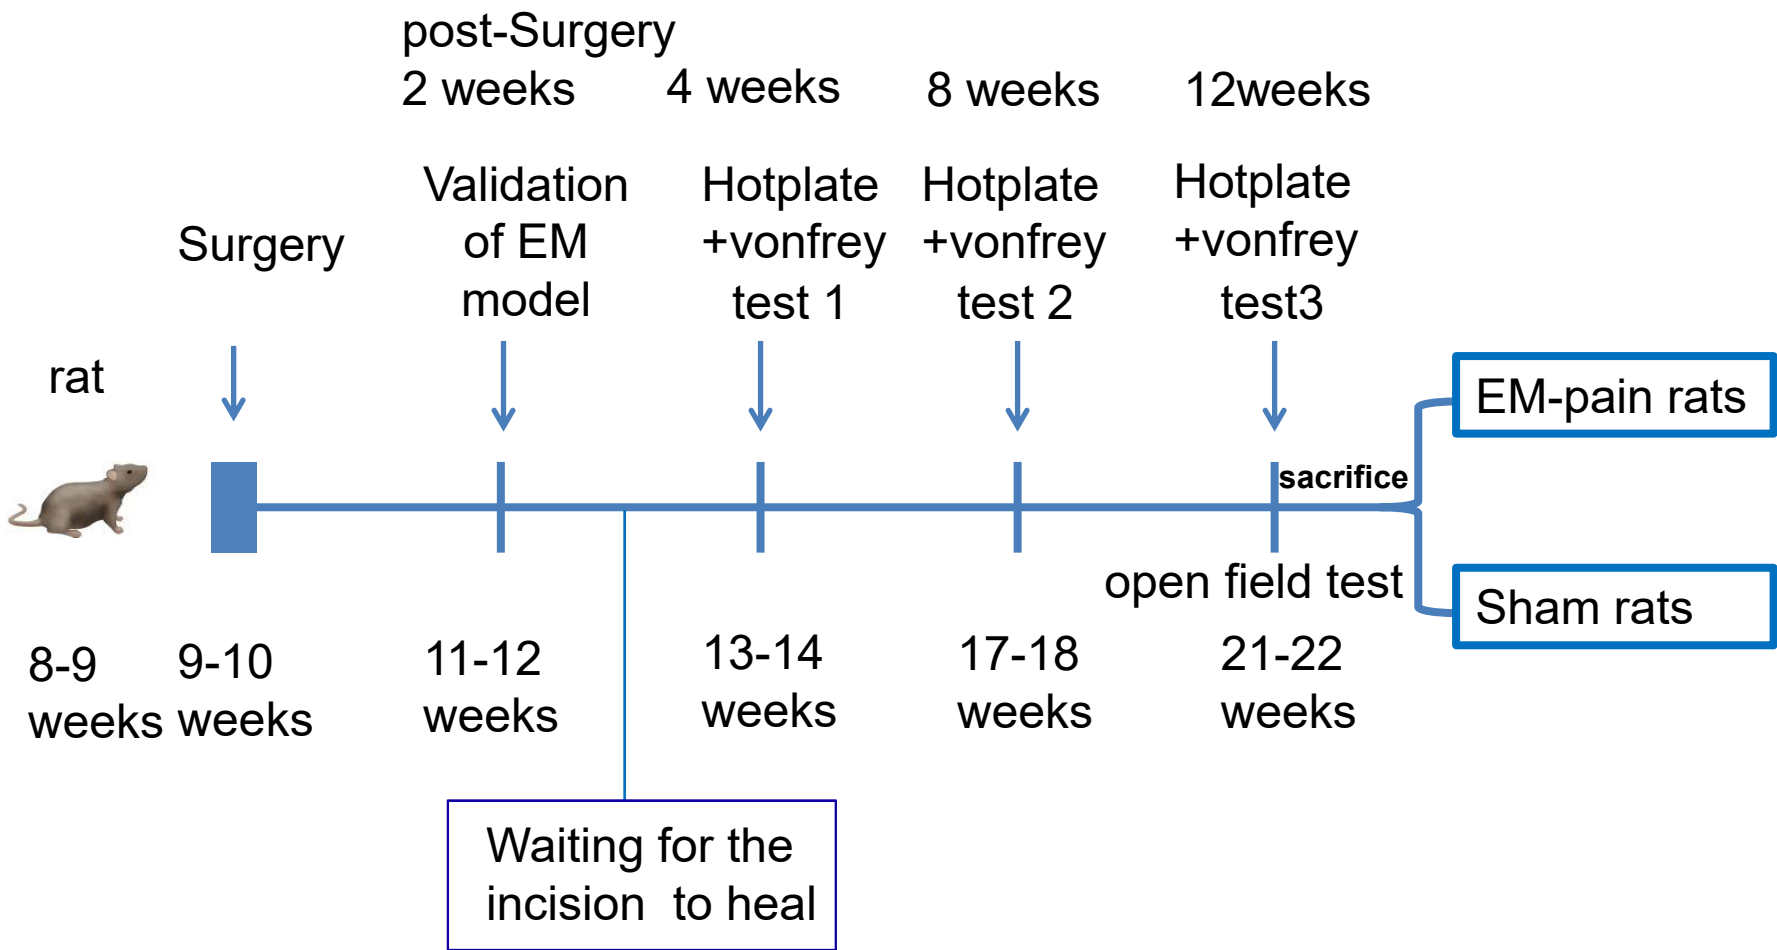

Supplementary figure 1:  
The female rats were 8 to 9 weeks old when we bought them. We started making the modeling after a week of acclimatization. Laparotomy was performed to verify the success of the model in the second week after surgery. We started detecting the pain model until the fourth week after modeling resulting from waiting for the abdominal incision to heal. At this time, these rats were about 15-16 weeks old, and they were adult rats. Pain threshold value by behavioristics was measured three times per 4-week intervals to test the long-term endometriosis pain model.
